# Supplementary material
Source: PubMed Central journal article supplement (PMC6410954)
Supplement: ptj0898-eFigure-1.pdf [file ptj0898-eFigure-1.pdf]

## Reliability of Physical Activity Measures After Total Knee Arthroplasty

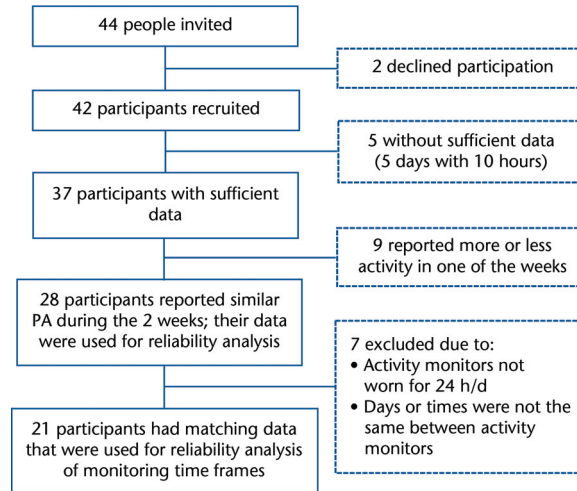

**eFigure 1.**

Flow chart of participants whose data were included in the final analysis. PA=physical activity.
