# Supplementary material
Source: PubMed Central journal article supplement (PMC6410954)
Supplement: ptj0898-eFigure-2.pdf [file ptj0898-eFigure-2.pdf]

## Reliability of Physical Activity Measures After Total Knee Arthroplasty

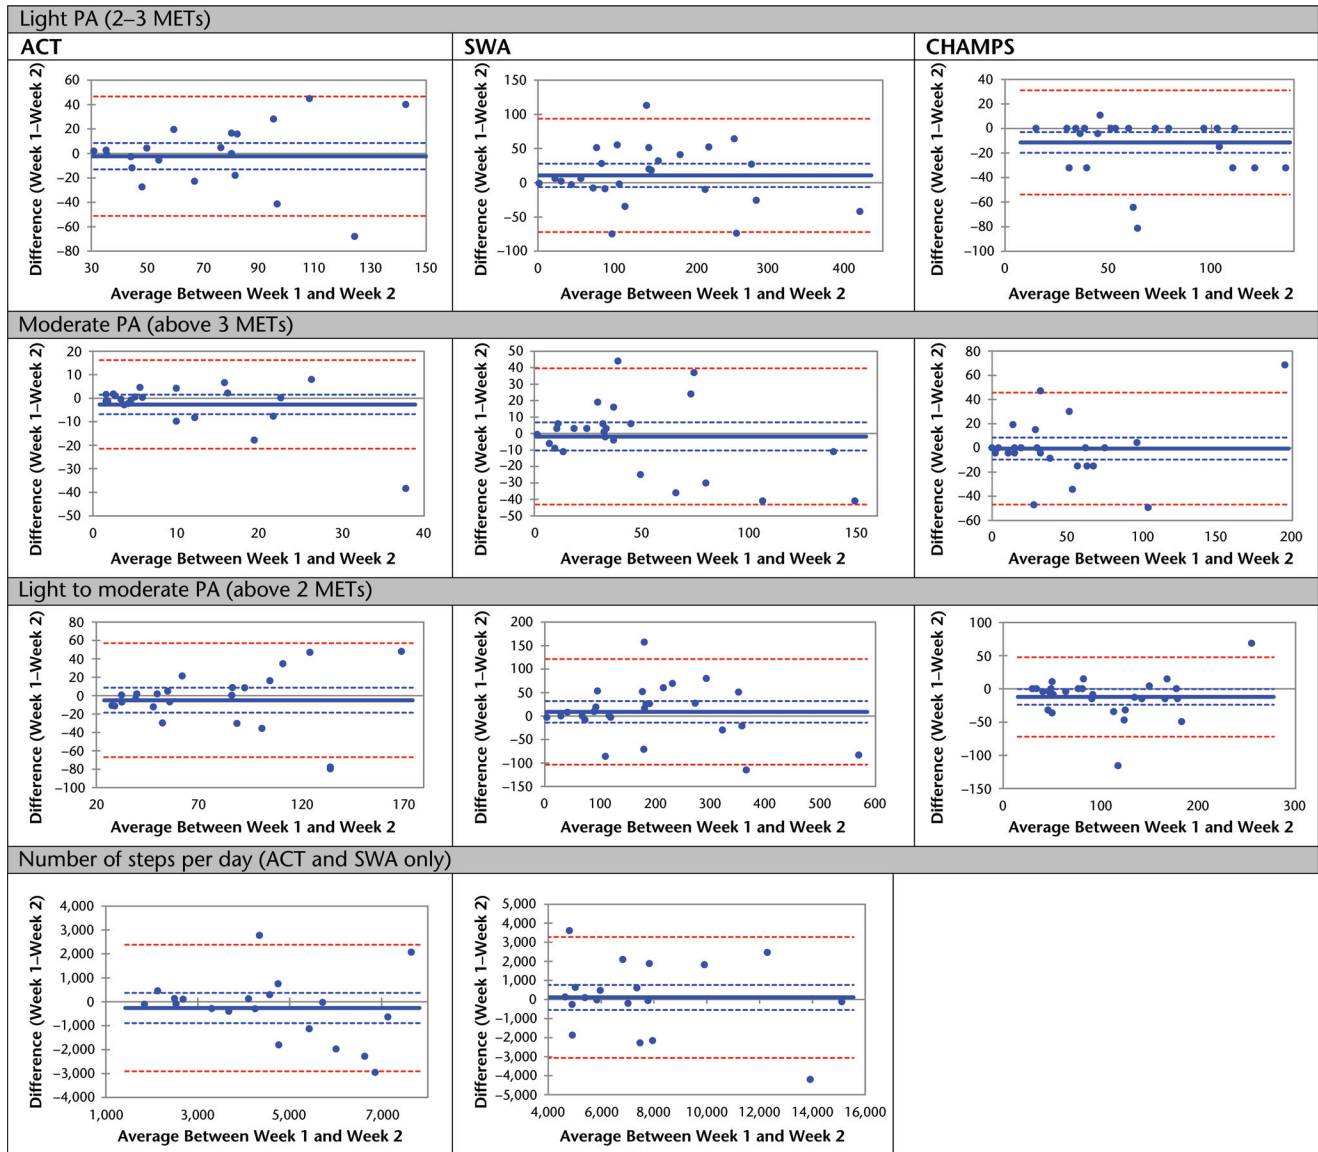

**eFigure 2.**

Bland-Altman plots from physical activity (PA) measures of duration (min/d) and number of steps from participants whose data were included in the reliability analysis. The blue solid line indicates the mean of the difference between measures from week 1 and those from week 2. The blue dashed lines indicate the 95% confidence interval for the difference between weeks. The red dashed lines indicate the 95% limit of agreement between the pooled means of PA measures for both weeks. ACT=Actigraph, CHAMPS=Community Healthy Activities Model Program for Seniors, METs=metabolic equivalents, SWA=SenseWear Armband.
